# Supplementary material for: Grafting of Crown Ether and Cryptand Macrocycles on Large Pore Stellate Mesoporous Silica for Sodium Cation Extraction
Source: MDPI journal article supplement (doi:10.3390/molecules28124622), 2023-06-07
Supplement: s1 [file s1]

## Supplementary Materials

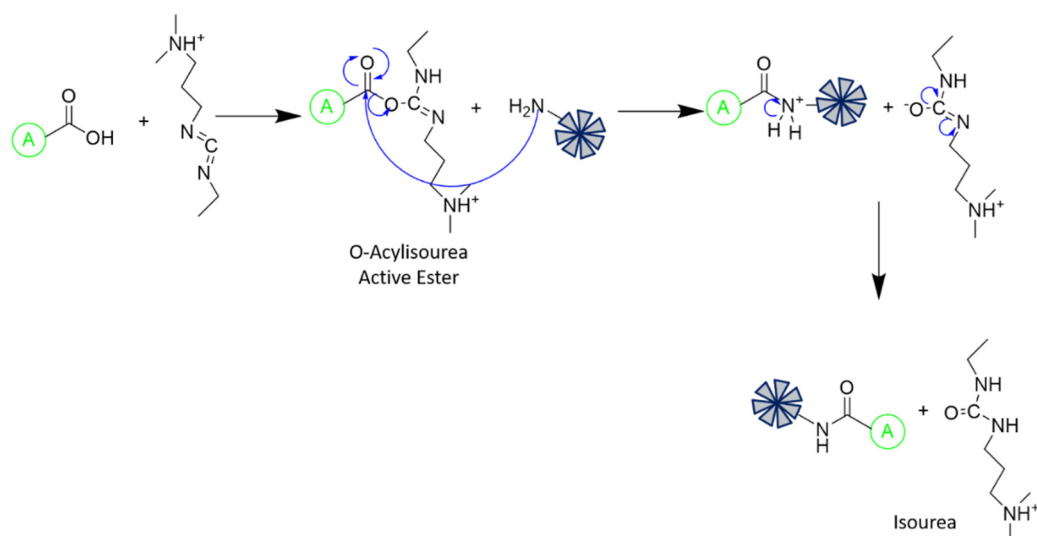

**Scheme S1.** Mechanism of cryptand grafting by EDC.

**Table S1.** Control experiments with APTES-STMS in MeOH: H<sub>2</sub>O (80:20) and in pure water. The value “0” means that the measure is below the detection limit of ICP-AES apparatus (0.07 ppm)

|                                                                                                    | MeOH: H <sub>2</sub> O (80:20) |                        | H <sub>2</sub> O            |                             |                             |
|----------------------------------------------------------------------------------------------------|--------------------------------|------------------------|-----------------------------|-----------------------------|-----------------------------|
|                                                                                                    | 1.1 mM Na <sup>+</sup>         | 5.5 mM Na <sup>+</sup> | 0.7 mM Na <sup>+</sup> pH=7 | 3.7 mM Na <sup>+</sup> pH=7 | 3.7 mM Na <sup>+</sup> pH=5 |
| Capture efficiency (%)                                                                             | 6.2                            | 0                      | 0.13                        | 0                           | 0.6                         |
| Capture capacity (nmol <sub>Na<sup>+</sup></sub> ·mg <sup>-1</sup> <sup>1</sup> SiO <sub>2</sub> ) | 56.7                           | 0                      | 1                           | 0                           | 11                          |

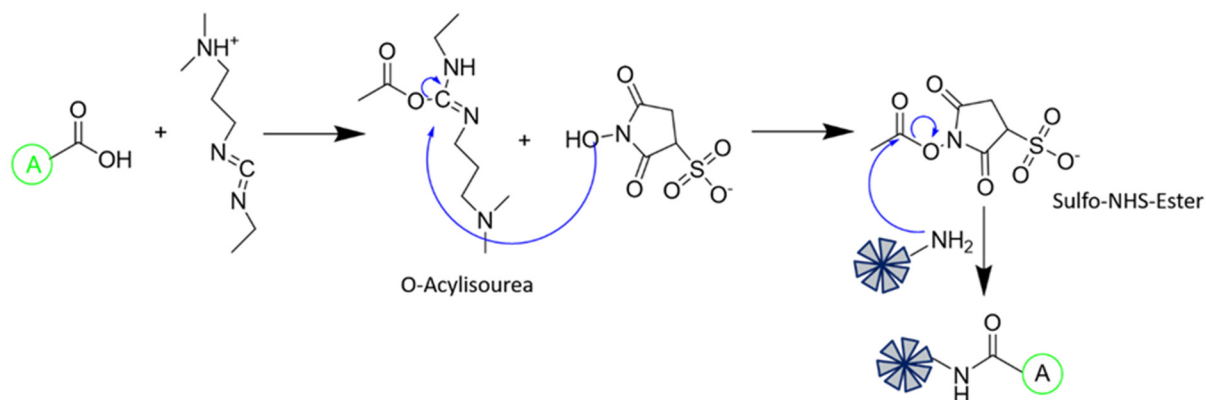

**Scheme S2.** Mechanism of cryptand grafting by EDC-NHS.

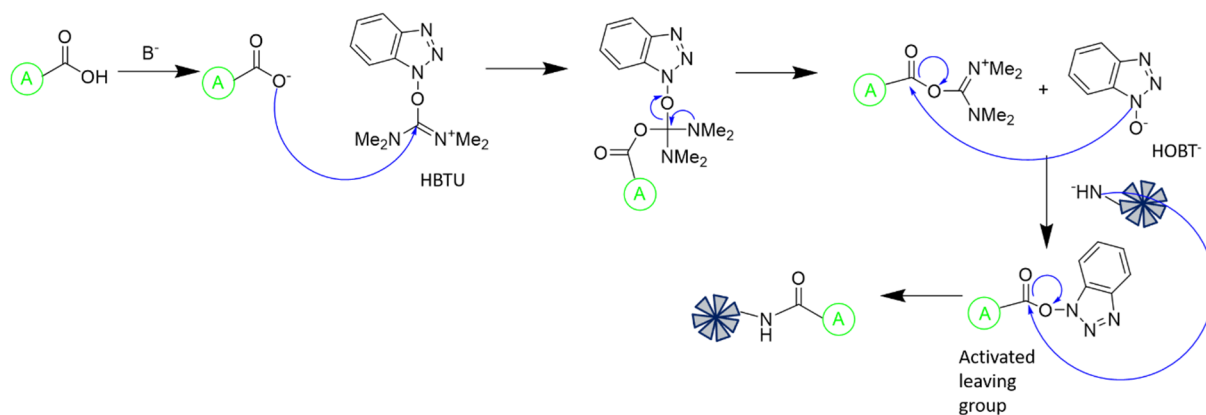

**Scheme S3.** Mechanism of cryptand grafting by HBTU.

**Table S2.** Control experiments with PEI-STMS in pure water. The value “0” means that the measure is below the detection limit of ICP-AES apparatus (0.07 ppm)

|                                                                                                                          | 0.197 mM Na <sup>+</sup><br>pH=7 | 0.98 mM Na <sup>+</sup> pH=7 |
|--------------------------------------------------------------------------------------------------------------------------|----------------------------------|------------------------------|
| <b>Capture Capacity</b><br>(nmol <sub>Na<sup>+</sup></sub> ·mg <sup>-1</sup><br><sub><sup>1</sup>SiO<sub>2</sub></sub> ) | 1.5                              | 0                            |
| <b>Capture Efficiency (%)</b>                                                                                            | 0.6                              | 0                            |
